# Supplementary material for: Dietary sucrose determines the regulatory activity of lithium on gene expression and lifespan in Drosophila melanogaster
Source: publisher site journal article supplement (doi:10.18632/aging.205933), 2024-06-10
Supplement: Supplementary file [file aging-v16i11-205933-supplementary-material-SD1.pdf]

## SUPPLEMENTARY FIGURES

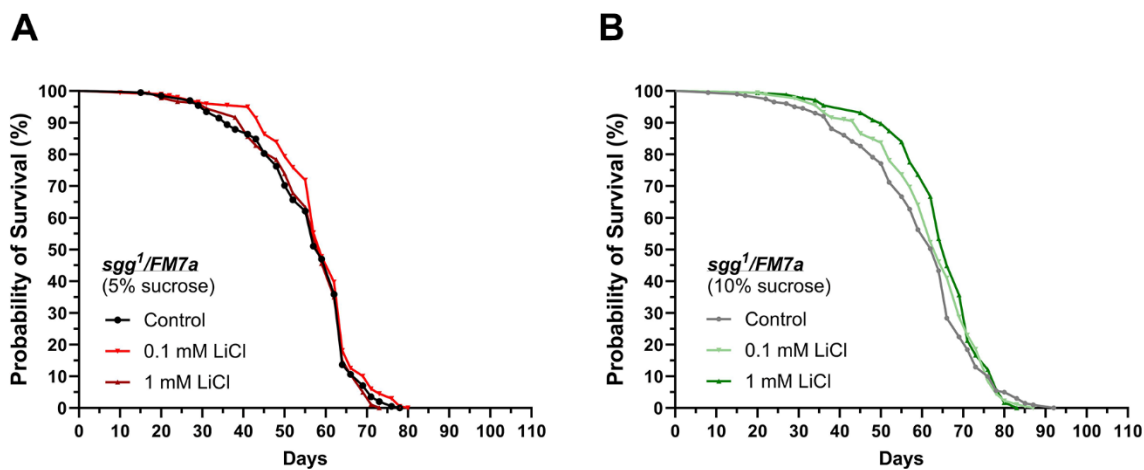

**Supplementary Figure 1. *sgg<sup>1</sup>FM7a* survival is not affected by dietary lithium added to a 5% or 10% diet.** Survival curves of female *sgg<sup>1</sup>FM7a* flies receiving 0.1 or 1 mM LiCl were not affected when supplemented to a 5% sucrose diet (A) or a 10% sucrose diet (B). Survival curves were compared using the Log-Rank Mantel-Cox test ( $p \leq 0.05$ ).

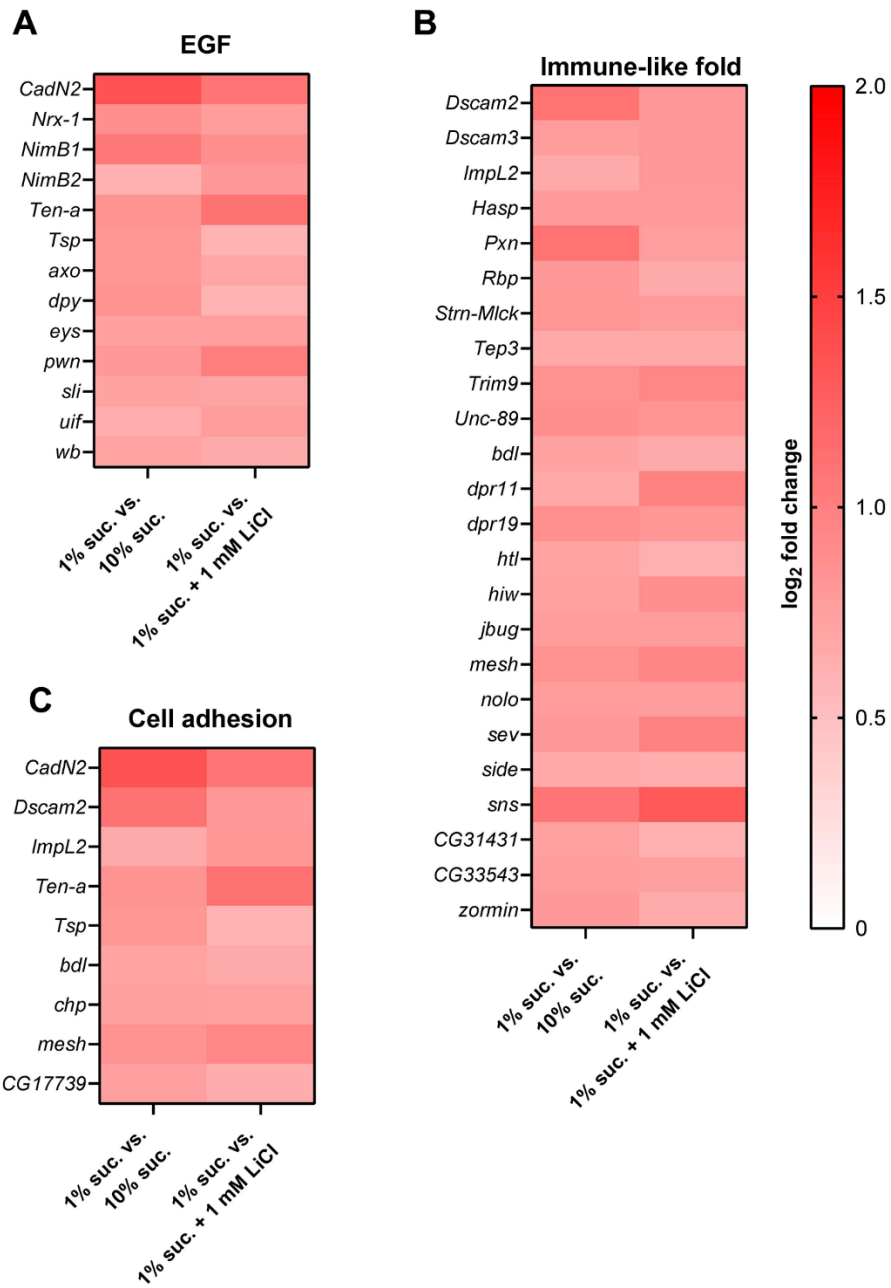

**Supplementary Figure 2. Lithium and sucrose alter transcript levels of genes involved with EGF, Immune-like fold and cell adhesion in female *w<sup>1118</sup>*.** Functional annotation of co-regulated genes differentially expressed in response to either elevating the dietary sucrose content by a factor of 10 or by supplementing 1 mM LiCl to the 1% sucrose diet (as listed in Supplementary Table 3.) revealed significant clusters regarding the following terms: epidermal growth factor (EGF) (A), immune-like fold (B) and cell adhesion (C) (Scale shows log<sub>2</sub> fold changes of differentially expressed genes according to FDR  $p \leq 0.05$ ).

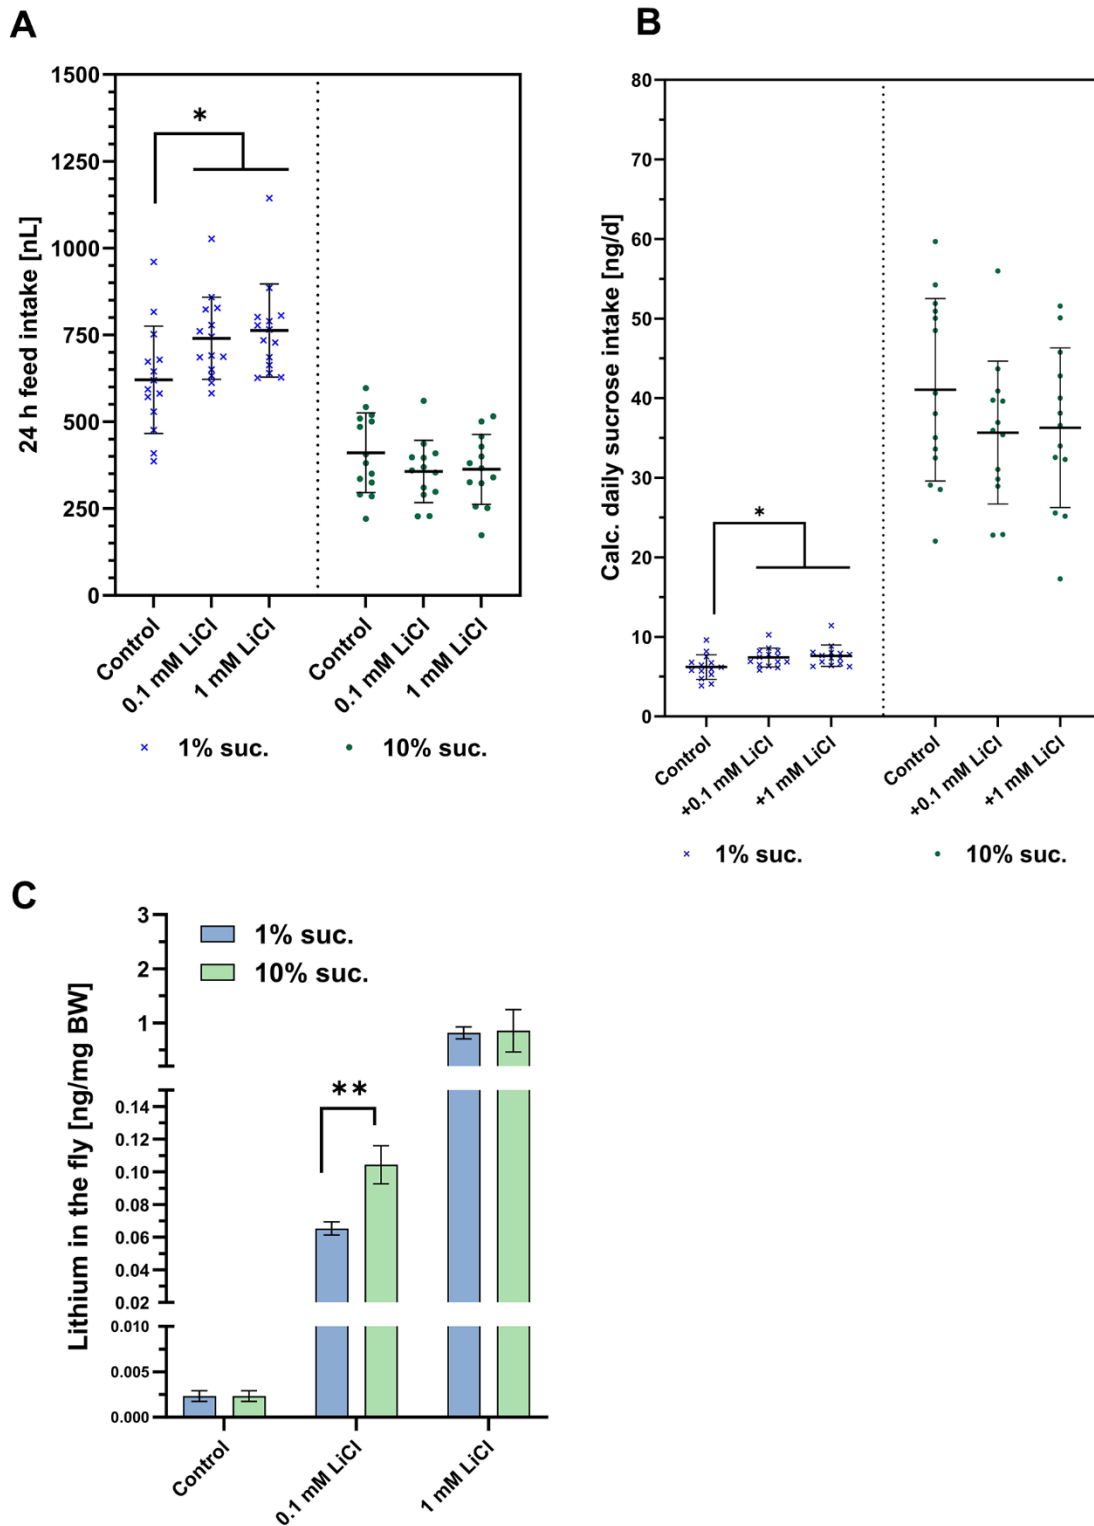

**Supplementary Figure 3. Higher feed intake due to low dietary sugar did not translate into higher lithium status in female *w<sup>1118</sup>*.** (A) The Excreta quantification assay revealed that lithium and sucrose both affect the feeding rate (Kruskal-Wallis test,  $*p \leq 0.05$ ). (B) Despite the higher feeding rate, the daily sugar intake was still significantly lower in flies receiving 1% sucrose compared to flies administered 10% sucrose diets (Kruskal-Wallis test,  $****p \leq 0.0001$ ). (C) Higher feeding rates did not translate into a higher lithium status in flies receiving 1% sucrose (Unpaired t-test,  $**p \leq 0.01$ ). Data is given as mean  $\pm$  SD,  $n = 13 - 14$  with each  $n$  comprising 20 female *w<sup>1118</sup>*.
