# Supplementary material for: Dietary sucrose determines the regulatory activity of lithium on gene expression and lifespan in Drosophila melanogaster
Source: publisher site journal article supplement (doi:10.18632/aging.205933), 2024-06-10
Supplement: Supplementary file [file aging-v16i11-205933-supplementary-material-SD2.pdf]

## SUPPLEMENTARY TABLES

Supplementary Table 1. Key resource table.

| Reagent or resource                                                     | Source                              | Identifier                                                                            |
|-------------------------------------------------------------------------|-------------------------------------|---------------------------------------------------------------------------------------|
| <b>Modified Organisms</b>                                               |                                     |                                                                                       |
| <i>w<sup>1118</sup></i>                                                 | Bloomington Drosophila Stock Center | Cat#5905                                                                              |
| <i>sgg1/FM7a/Dp(1;2;Y)w+</i>                                            | Bloomington Drosophila Stock Center | Cat#4095                                                                              |
| <b>Antibodies</b>                                                       |                                     |                                                                                       |
| Anti-GSK-3 clone 4G-1E                                                  | Merck                               | Cat#05-412                                                                            |
| Phospho-GSK-3 $\beta$ (Ser9) Rabbit mAb                                 | Cell signaling Technology           | Cat#5558                                                                              |
| Immun-Star goat anti-mouse (GAM)-HRP conjugate                          | Bio-Rad Laboratories                | Cat#1705047                                                                           |
| Immun-Star goat anti-rabbit                                             | Bio-Rad Laboratories                | Cat#1705046                                                                           |
| <b>Chemicals and kits</b>                                               |                                     |                                                                                       |
| Inactive dry yeast                                                      | Genesee                             | Cat#62-107                                                                            |
| Drosophila agar type 2                                                  | Genesee                             | Cat#66-103                                                                            |
| D(+)-sucrose                                                            | Carl Roth                           | Cat#4621.2; CAS-ID: 57-50-1                                                           |
| Propionic Acid                                                          | Carl Roth                           | Cat#6026.1; CAS-ID: 79-09-4                                                           |
| Nipagin/Tegosept                                                        | Genesee                             | Cat# 20-258                                                                           |
| EtOH absolute                                                           | VWR                                 | Cat#20821.296; CAS-ID: 64-17-5                                                        |
| Lithium chloride                                                        | Merck                               | Cat#105679; CAS-ID: 7447-41-8                                                         |
| ROTI load loading dye                                                   | Carl Roth                           | Cat#K929.1                                                                            |
| Pierce BCA Protein Assay Kit                                            | Thermo Fisher Scientific            | Cat#23225                                                                             |
| Polyacrylamide (4 - 15%) precast gels                                   | Bio-Rad Laboratories                | Cat#4561083EDU                                                                        |
| Methanol $\geq 99\%$                                                    | VWR                                 | Cat#L13255.AP; CAS-ID: 67-56-1                                                        |
| Bovine serum albumin (BSA)                                              | Carl Roth                           | Cat#T844.3; CAS-ID: 9048-46-8                                                         |
| Tween20                                                                 | Merck                               | Cat#P9416-50ML; CAS-ID: 9005-64-5                                                     |
| SuperSignal Western Blot Substrate                                      | Thermo Fisher Scientific            | Cat#A43841                                                                            |
| Triton X100                                                             | Merck                               | Cat#X100-5ML; CAS-ID: 9036-19-5                                                       |
| Infinity triglycerides liquid stable reagent                            | Thermo Fisher Scientific            | Cat#TR22421                                                                           |
| Glucose oxidase/oxidase-linked (GOD-PAP) kit                            | Dialab                              | Cat#D08220                                                                            |
| Trehalase (taken from the Kit)                                          | Megazyme                            | Cat#K-TREH                                                                            |
| Amyloglucosidase (taken from the Kit)                                   | Megazyme                            | Cat#E-AMGDFNG-20ML                                                                    |
| Trehalose dihydrate                                                     | Carl Roth                           | Cat#5151.3; CAS-ID: 6138-23-4                                                         |
| Glycogen                                                                | Sigma Aldrich                       | Cat#10901393001                                                                       |
| peqGOLD TriFast                                                         | VWR                                 | Cat#30-2010                                                                           |
| Diethylpyrocarbonat (DEPC)                                              | Merck                               | Cat#D5758; CAS-ID: 1609-47-8                                                          |
| DNA-free DNA Removal Kit                                                | Thermo Fisher Scientific            | Cat#AM1906                                                                            |
| TruSeq Stranded mRNA Preb kit                                           | Illumina                            | Cat#20020595                                                                          |
| sodium hypochlorite (5-10 %)                                            | Carl Roth                           | Cat#6846.1; CAS-ID: 7681-52-9                                                         |
| DNeasy Blood & Tissue Kit                                               | Qiagen                              | Cat#69504                                                                             |
| qPCRBIO SyGreen kit                                                     | PCR Biosystems                      | Cat#PB25.11-03                                                                        |
| <b>Online tools and software</b>                                        |                                     |                                                                                       |
| Image Lab 5.0                                                           | Bio-Rad Laboratories                | <a href="https://www.bio-rad.com">https://www.bio-rad.com</a>                         |
| CLC Genomics Workbench version 9.5.2                                    | Qiagen                              | <a href="https://digitalinsights.qiagen.com/">https://digitalinsights.qiagen.com/</a> |
| Database for Annotation, Visualization and Integrated Discovery (DAVID) | National Institutes of Health, USA  | <a href="https://david.ncifcrf.gov/tools.jsp">https://david.ncifcrf.gov/tools.jsp</a> |
| GraphPad Prism 10.0.2                                                   | GraphPad software                   | <a href="https://www.graphpad.com/">https://www.graphpad.com/</a>                     |
| Pscan Web 1.6                                                           | Bio.tools, supported by ELIXIR      | <a href="http://159.149.160.88/pscan/">http://159.149.160.88/pscan/</a>               |
| CLC Genomics Workbench 21.0.3                                           | Qiagen                              | <a href="https://digitalinsights.qiagen.com/">https://digitalinsights.qiagen.com/</a> |
| <b>Technical equipment</b>                                              |                                     |                                                                                       |
| TissueLyser II                                                          | Qiagen                              | N/A                                                                                   |
| trans-blot turbo transfer system                                        | Bio-Rad Laboratories                | Cat#17001918                                                                          |

**Supplementary Table 2. Transcription factor binding site analysis.**

| Matrix ID | Symbol           | Name                                       | P-value   |
|-----------|------------------|--------------------------------------------|-----------|
| MA0535.1  | <b>Mad</b>       | Mothers against Dpp                        | 3.54 E-16 |
| MA1700.1  | <b>Clamp</b>     | Chromatin-linked adaptor for MSL proteins  | 6.41 E-16 |
| MA0205.2  | <b>Trl</b>       | Trithorax-like                             | 8.38 E-13 |
| MA0213.1  | <b>brk</b>       | brinker                                    | 5.92 E-09 |
| MA0449.1  | <b>h</b>         | hairy                                      | 1.37 E-07 |
| MA0185.1  | <b>Deaf1</b>     | Deformed epidermal autoregulatory factor-1 | 1.46 E-07 |
| MA0443.1  | <b>btd</b>       | buttonhead                                 | 3.11 E-06 |
| MA0247.2  | <b>tin</b>       | tinman                                     | 4.54 E-06 |
| MA0456.1  | <b>opa</b>       | odd paired                                 | 1.16 E-05 |
| MA0255.1  | <b>z</b>         | zeste                                      | 1.22 E-05 |
| MA0016.1  | <b>usp</b>       | ultraspiracle                              | 4.02 E-05 |
| MA0450.1  | <b>hkb</b>       | huckebein                                  | 0.0003    |
| MA0023.1  | <b>dl(var.2)</b> | dorsal                                     | 0.00052   |
| MA0917.1  | <b>gcm2</b>      | glial cells missing 2                      | 0.0012    |
| MA0193.1  | <b>schlank</b>   | schlank                                    | 0.0042    |
| MA0086.2  | <b>sna</b>       | snail                                      | 0.02      |
| MA1461.1  | <b>sv</b>        | shaven                                     | 0.03      |

Co-regulated genes of the overlap in Figure 5 were analyzed for the prevalence of transcription factor binding sites, revealing high frequency of sequences assigned to Mothers against Dpp (Mad) in female *w<sup>1118</sup>*.

**Supplementary Table 3. Functional annotation chart.**

| Category                 | Term                                  | Count | %    | p-value  | Benjamini |
|--------------------------|---------------------------------------|-------|------|----------|-----------|
| GOTERM_CC_DIRECT         | chorion                               | 20    | 61.7 | 1.4 E-18 | 2.2 E-16  |
| GOTERM_CC_DIRECT         | integral component of plasma membrane | 47    | 45.3 | 1.1 E-11 | 9.1 E-10  |
| UP_SEQ_FEATURE           | COMPBIAS:Polar residues               | 214   | 39.6 | 3.4 E-09 | 2.1 E-06  |
| UP_SEQ_FEATURE           | COMPBIAS:Pro residues                 | 53    | 34.1 | 4.8 E-08 | 1.5 E-05  |
| UP_KW_CELLULAR_COMPONENT | Membrane                              | 161   | 31.8 | 2.2 E-06 | 4.8 E-05  |
| UP_KW_CELLULAR_COMPONENT | Secreted                              | 31    | 30.7 | 1.8 E-05 | 2.0 E-04  |
| GOTERM_CC_DIRECT         | extracellular region                  | 41    | 26.1 | 4.1 E-06 | 2.2 E-04  |
| INTERPRO                 | Immunoglobulin-like fold              | 23    | 11.2 | 4.9 E-07 | 2.7 E-04  |
| UP_KW_BIOLOGICAL_PROCESS | Vision                                | 11    | 11.2 | 5.6 E-06 | 2.8 E-04  |
| UP_KW_DOMAIN             | Signal                                | 187   | 10.4 | 2.3 E-05 | 4.9 E-04  |
| GOTERM_CC_DIRECT         | synapse                               | 19    | 10   | 1.2 E-05 | 4.9 E-04  |
| UP_KW_PTM                | Disulfide bond                        | 53    | 8.7  | 4.5 E-05 | 5.0 E-04  |
| INTERPRO                 | Immunoglobulin subtype 2              | 16    | 8.7  | 2.5 E-06 | 5.9 E-04  |
| INTERPRO                 | Immunoglobulin subtype                | 16    | 8.3  | 3.5 E-06 | 5.9 E-04  |
| INTERPRO                 | Epidermal growth factor-like domain   | 13    | 7.4  | 4.5 E-06 | 5.9 E-04  |
| INTERPRO                 | Immunoglobulin I-set                  | 13    | 6.8  | 5.2 E-06 | 5.9 E-04  |
| UP_KW_MOLECULAR_FUNCTION | Retinal protein                       | 5     | 6.6  | 1.1 E-05 | 6.2 E-04  |
| UP_KW_MOLECULAR_FUNCTION | Photoreceptor protein                 | 5     | 4.9  | 2.5 E-05 | 7.1 E-04  |
| INTERPRO                 | Immunoglobulin-like domain            | 17    | 4.2  | 7.7 E-06 | 7.2 E-04  |
| UP_SEQ_FEATURE           | COMPBIAS:Basic and acidic residues    | 150   | 4    | 3.7 E-06 | 7.8 E-04  |

|                          |                                                |     |     |          |          |
|--------------------------|------------------------------------------------|-----|-----|----------|----------|
| INTERPRO                 | Concanavalin A-like lectin/glucanase, subgroup | 11  | 3.6 | 1.6 E-05 | 1.3 E-03 |
| UP_SEQ_FEATURE           | TRANSMEM:Helical                               | 145 | 3.4 | 8.5 E-06 | 1.3 E-03 |
| UP_KW_PTM                | Glycoprotein                                   | 49  | 3.4 | 2.6 E-04 | 1.4 E-03 |
| SMART                    | EGF                                            | 13  | 3.4 | 1.0 E-05 | 1.6 E-03 |
| SMART                    | IGc2                                           | 16  | 3.4 | 2.7 E-05 | 2.0 E-03 |
| SMART                    | IG                                             | 16  | 3.4 | 3.8 E-05 | 2.0 E-03 |
| UP_SEQ_FEATURE           | CARBOHYD:N-linked (GlcNAc...) asparagine       | 39  | 3.2 | 1.9 E-05 | 2.2 E-03 |
| UP_SEQ_FEATURE           | TOPO_DOM:Extracellular                         | 32  | 2.8 | 2.1 E-05 | 2.2 E-03 |
| INTERPRO                 | Fibronectin, type III                          | 11  | 2.8 | 3.4 E-05 | 2.3 E-03 |
| INTERPRO                 | Visual pigments (opsins) retinal binding site  | 5   | 2.8 | 3.7 E-05 | 2.3 E-03 |
| GOTERM_CC_DIRECT         | integral component of membrane                 | 123 | 2.3 | 1.1 E-04 | 3.6 E-03 |
| UP_SEQ_FEATURE           | DOMAIN:EGF-like                                | 11  | 2.3 | 6.0 E-05 | 5.4 E-03 |
| GOTERM_BP_DIRECT         | multicellular organism development             | 10  | 2.3 | 9.7 E-06 | 8.5 E-03 |
| GOTERM_CC_DIRECT         | neuromuscular junction                         | 11  | 2.3 | 3.7 E-04 | 9.8 E-03 |
| UP_KW_LIGAND             | Chromophore                                    | 5   | 2.3 | 4.8 E-04 | 1.1 E-02 |
| UP_SEQ_FEATURE           | COMPBIAS:Basic residues                        | 41  | 2.1 | 1.7 E-04 | 1.3 E-02 |
| UP_SEQ_FEATURE           | DOMAIN:Ig-like                                 | 15  | 2.1 | 1.8 E-04 | 1.3 E-02 |
| UP_KW_BIOLOGICAL_PROCESS | Cell adhesion                                  | 9   | 1.9 | 6.4 E-04 | 1.6 E-02 |
| INTERPRO                 | Laminin G domain                               | 6   | 1.9 | 2.9 E-04 | 1.6 E-02 |
| SMART                    | LamG                                           | 6   | 1.9 | 4.3 E-04 | 1.7 E-02 |
| UP_SEQ_FEATURE           | TOPO_DOM:Cytoplasmic                           | 35  | 1.9 | 2.7 E-04 | 1.7 E-02 |
| UP_SEQ_FEATURE           | DOMAIN:Fibronectin type-III                    | 9   | 1.9 | 3.0 E-04 | 1.7 E-02 |
| UP_KW_DOMAIN             | Immunoglobulin domain                          | 7   | 1.9 | 1.7 E-03 | 1.8 E-02 |
| KEGG_PATHWAY             | Lysosome                                       | 9   | 1.5 | 3.8 E-04 | 1.8 E-02 |
| SMART                    | FN3                                            | 9   | 1.5 | 5.9 E-04 | 1.8 E-02 |
| UP_SEQ_FEATURE           | REGION:Disordered                              | 291 | 1.3 | 4.0 E-04 | 2.1 E-02 |
| GOTERM_MF_DIRECT         | G-protein coupled photoreceptor activity       | 5   | 1.3 | 6.3 E-05 | 2.3 E-02 |
| GOTERM_BP_DIRECT         | visual perception                              | 10  | 1.3 | 6.3 E-05 | 2.7 E-02 |
| GOTERM_CC_DIRECT         | cytoskeleton of presynaptic active zone        | 4   | 1.1 | 1.6 E-03 | 3.3 E-02 |
| GOTERM_CC_DIRECT         | presynaptic active zone                        | 6   | 1.1 | 1.7 E-03 | 3.3 E-02 |
| GOTERM_BP_DIRECT         | protein-chromophore linkage                    | 5   | 1.1 | 1.4 E-04 | 3.7 E-02 |
| GOTERM_BP_DIRECT         | axon guidance                                  | 16  | 1.1 | 1.8 E-04 | 3.7 E-02 |
| GOTERM_BP_DIRECT         | chorion-containing eggshell formation          | 7   | 1.1 | 2.1 E-04 | 3.7 E-02 |
| GOTERM_BP_DIRECT         | neuromuscular synaptic transmission            | 9   | 1.1 | 2.6 E-04 | 3.8 E-02 |
| UP_KW_CELLULAR_COMPONENT | Synapse                                        | 9   | 0.8 | 6.2 E-03 | 4.5 E-02 |
| SMART                    | LamG                                           | 6   | 1.9 | 4.3 E-04 | 1.7 E-02 |
| UP_SEQ_FEATURE           | TOPO_DOM:Cytoplasmic                           | 35  | 1.9 | 2.7 E-04 | 1.7 E-02 |
| UP_SEQ_FEATURE           | DOMAIN:Fibronectin type-III                    | 9   | 1.9 | 3.0 E-04 | 1.7 E-02 |
| UP_KW_DOMAIN             | Immunoglobulin domain                          | 7   | 1.9 | 1.7 E-03 | 1.8 E-02 |
| KEGG_PATHWAY             | Lysosome                                       | 9   | 1.5 | 3.8 E-04 | 1.8 E-02 |
| SMART                    | FN3                                            | 9   | 1.5 | 5.9 E-04 | 1.8 E-02 |
| UP_SEQ_FEATURE           | REGION:Disordered                              | 291 | 1.3 | 4.0 E-04 | 2.1 E-02 |
| GOTERM_MF_DIRECT         | G-protein coupled photoreceptor activity       | 5   | 1.3 | 6.3 E-05 | 2.3 E-02 |
| GOTERM_BP_DIRECT         | visual perception                              | 10  | 1.3 | 6.3 E-05 | 2.7 E-02 |
| GOTERM_CC_DIRECT         | cytoskeleton of presynaptic active zone        | 4   | 1.1 | 1.6 E-03 | 3.3 E-02 |
| GOTERM_CC_DIRECT         | presynaptic active zone                        | 6   | 1.1 | 1.7 E-03 | 3.3 E-02 |
| GOTERM_BP_DIRECT         | protein-chromophore linkage                    | 5   | 1.1 | 1.4 E-04 | 3.7 E-02 |
| GOTERM_BP_DIRECT         | axon guidance                                  | 16  | 1.1 | 1.8 E-04 | 3.7 E-02 |
| GOTERM_BP_DIRECT         | chorion-containing eggshell formation          | 7   | 1.1 | 2.1 E-04 | 3.7 E-02 |
| GOTERM_BP_DIRECT         | neuromuscular synaptic transmission            | 9   | 1.1 | 2.6 E-04 | 3.8 E-02 |
| UP_KW_CELLULAR_COMPONENT | Synapse                                        | 9   | 0.8 | 6.2 E-03 | 4.5 E-02 |

Genes of the overlap in Figure 5 were analyzed for the functional annotation (female w1118). Only statistically significant clusters are given (Benjamini  $p < 0.05$ ).
